# Supplementary material
Source: MDPI journal article supplement (https://www.mdpi.com/2076-3417/14/6/2633)
Supplement: s1 [file s1]

# Supplementary Materials: Modeling and Analysis of a Radiative Thermal Memristor

Ambali Alade Odebowale, Andergachew Mekonnen Berhe, Haroldo T. Hattori and Andrey E. Miroshnichenko \*

## 1. Performance of the radiative thermal memristor

### 1.1. Thermal conductance Curve

The plot depicted in Figure S1 illustrates the relationship between Thermal Conductance (G) and Temperature Difference ( $\Delta T$ ) across various values of  $\theta$ . This visual representation effectively demonstrates how changes in the parameter  $\theta$  influence the width of the curves in the plot. In other words, the variations in  $\theta$  play a crucial role in determining the spread of the plotted curves, which decreases as  $\theta$  decreases.

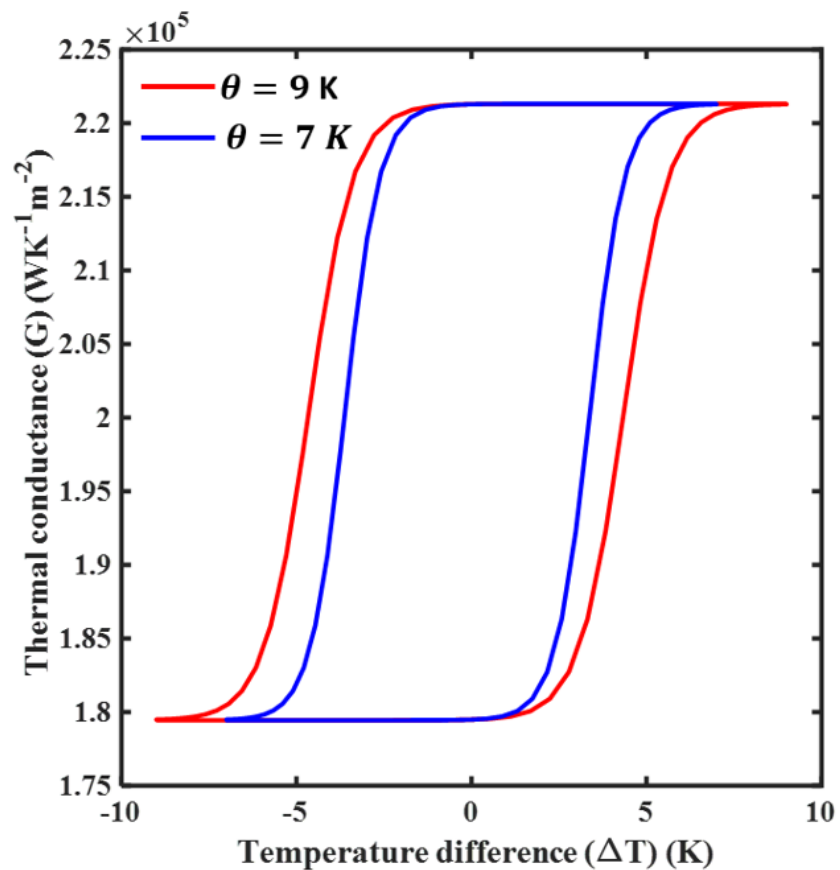

**Figure S1.** Closed loops of thermal conductance against temperature difference ( $\Delta T$ ) at different values of  $\theta$

### 1.2. Determination of the constant ( $\alpha$ )

The value of  $\alpha$  is calculated as follows: In the linear segment of the Lissajous curve, the heat flux ( $Q$ ) is directly proportional to the temperature difference ( $\Delta T$ ), expressed as  $Q \propto \Delta T$ . As outlined in the main manuscript, this relationship can be represented as  $Q = G\Delta T$ , where  $G$  denotes the slope of the linear portion of the zero crossing.

The expression for  $G$  is given by:

$$G = \frac{\alpha k_{m(i)} T_{av}}{d} \quad (1)$$

$$\alpha = \frac{G \cdot d}{k_m T_{av}} \quad (2)$$

Where:

- $k_m = 5.3 \text{ Wm}^{-1}\text{K}^{-1}$
- $k_i = 3.4 \text{ Wm}^{-1}\text{K}^{-1}$
- $d = 10 \mu\text{m}$
- $T_{av} = 305.5 \text{ K}$
- $G \approx 0.22 \text{ MWm}^{-2}\text{K}^{-1}$

By substituting these parameters into Equation 2, we can determine the value of  $\alpha$ . Thus, we have:

$$\alpha = \frac{G \cdot d}{k_m T_{av}} = 0.0013587 \quad (3)$$

## 2. Code

This excerpt presents a segment of the Mathematica code employed in the context of this study.

$$\begin{aligned}
 k(T\_ , T0\_ ) &:= \frac{k_m - k_i}{\exp(-\beta(T - T0)) + 1} + k_i; \\
 keffinv(T\_ , T0\_ ) &:= \frac{1}{k(T, T0)} + \frac{1}{k1}; \\
 keff(T\_ , T0\_ ) &:= \frac{1}{keffinv(T, T0)}; \\
 \Delta T(t\_ ) &= \theta \sin(2\pi t); \\
 \delta T(t\_ ) &= \frac{\partial \Delta T(t)}{\partial t}; \\
 \Delta T1(t\_ ) * &= \theta1 \sin(2\pi t); \\
 \delta T1(t\_ ) &= \frac{\partial \Delta T1(t)}{\partial t}; \\
 kt(t\_ ) &:= \begin{cases} k(T0 + \Delta T(t), T0h) & \delta T(t) > 0 \\ k(T0 + \Delta T(t), T0c) & \delta T(t) < 0 \end{cases} \\
 keff(t\_ ) &:= \begin{cases} keff(T0 + \Delta T(t), T0h) & \delta T(t) > 0 \\ keff(T0 + \Delta T(t), T0c) & \delta T(t) < 0 \end{cases} \\
 kteff1(t\_ ) &:= \begin{cases} keff(T0 + \Delta T1(t), T0h) & \delta T1(t) > 0 \\ keff(T0 + \Delta T1(t), T0c) & \delta T1(t) < 0 \end{cases} \\
 Qeff(t\_ , d\_ ) &:= \frac{kteff(t)((\Delta T(t) + T0) - T0)}{d}; \\
 Qeff1(t\_ , d\_ ) &:= \frac{kteff1(t)((\Delta T1(t) + T0) - T0)}{d}; \\
 Meff(t\_ ) &:= \frac{\Delta T(t)}{Qeff\left(t, \frac{1}{100000}\right)}; \\
 Meff1(t\_ ) &:= \frac{\Delta T1(t)}{Qeff1\left(t, \frac{1}{100000}\right)}; \\
 ParametricPlot &\left[\left(\begin{array}{cc} \Delta T(t) & Meff(t) \\ \Delta T1(t) & Meff1(t) \end{array}\right), \{t, 0, 1\}, \text{AspectRatio} \rightarrow \text{Full}\right]
 \end{aligned}$$
